# Supplementary material for: Design of high-temperature f-block molecular nanomagnets through the control of vibration-induced spin relaxation
Source: Royal Society of Chemistry journal article supplement (doi:10.1039/c9sc03133b), 2019-12-02
Supplement: c9sc03133b3.zip [file c9sc03133b3.zip]

## Sheet: Hoja1
	h =	6.626e-34	J·s	l.c. = classical limit for different 1D harmonic vibrational energy levels (n=0 ground level, n=1 first excited level)
	Mode	1	2	3	4	5	6	7	8	9	10	11	12	13	14	15		Change ν and k for each vibrational mode
	ν (cm-1)	29.9188	32.3279	39.1771	49.5392	50.2326	56.4047	66.5726	74.1832	74.9487	84.4512	91.2022	101.685	108.707	127.828	132.483		and both l.c. (n=0) and l.c. (n=1) will be changed
	k (mD/A)	0.0017	0.0017	0.0027	0.0058	0.0044	0.0066	0.0081	0.0152	0.0157	0.0165	0.0174	0.0257	0.027	0.0251	0.0281		authomatically.
	l.c.(n=0) (Å)	0.591472	0.614824	0.537057	0.412047	0.476379	0.412166	0.404196	0.311471	0.308048	0.318968	0.322786	0.280445	0.282901	0.318173	0.306136
	l.c.(n=1) (Å)	1.02446	1.06491	0.93021	0.713686	0.825113	0.713892	0.700087	0.539483	0.533555	0.552469	0.559081	0.485745	0.489998	0.551091	0.530243		ν is the harmonic frequency while k is the force
	Mode	16	17	18	19	20	21	22	23	24	25	26	27	28	29	30		constant of the given mode. These two variables
	ν (cm-1)	135.012	136.866	170.036	172.558	175.44	175.77	200.523	201.202	208.703	210.408	219.738	220.029	222.765	223.499	240.541		are used here as directly provided by Gaussian09
	k (mD/A)	0.0435	0.0328	0.0585	0.0438	0.043	0.0577	0.0364	0.037	0.0506	0.0527	0.0445	0.0508	0.0486	0.0502	0.0715
	l.c.(n=0) (Å)	0.248386	0.288003	0.24037	0.279845	0.284785	0.246077	0.330916	0.328777	0.286336	0.281717	0.313299	0.293423	0.30185	0.29749	0.2586
	l.c.(n=1) (Å)	0.430217	0.498836	0.416332	0.484705	0.493261	0.426217	0.573163	0.569459	0.495948	0.487947	0.542649	0.508224	0.52282	0.515268	0.447908
	Mode	31	32	33	34	35	36	37	38	39	40	41	42	43	44	45
	ν (cm-1)	242.52	245.179	254.861	257.417	258.757	263.031	263.428	267.392	269.152	278.562	280.117	287.902	288.896	292.515	293.278
	k (mD/A)	0.0781	0.0758	0.0789	0.0434	0.0441	0.0644	0.0522	0.0648	0.055	0.0543	0.056	0.062	0.0763	0.0854	0.0629
	l.c.(n=0) (Å)	0.248447	0.253567	0.253396	0.343368	0.341517	0.284936	0.316725	0.2864	0.311892	0.319335	0.315328	0.303818	0.274344	0.260934	0.304439
	l.c.(n=1) (Å)	0.430323	0.439191	0.438895	0.594731	0.591525	0.493523	0.548583	0.49606	0.540212	0.553105	0.546164	0.526228	0.475177	0.451952	0.527304
	min dis (minimum displacement of the distortion coordinate of a given vibrational mode, Angstroms) is provided by the prefactor-v2.f90 code for each vibrational mode.
	We take mad (maximum displacement of the distortion coordinate of a given vibrational mode, Angstroms) as the value (min dis)*s where s is the natural number such that (min dis)*s is the smallest real number above l.c. (n=0) (Angstroms).
	The parameters s are introduced in the geom_dist_input input along with the corresponding min dis values.
	The number of distorted geometries for each vibrational mode is 2*s. Do not forget to also include the relaxed geometry, which corresponds to the value zero in the distortion coordinate of the given vibrational mode.
	Mode	1	2	3	4	5	6	7	8	9	10	11	12	13	14	15
	min dis (Å)	0.045	0.042	0.042	0.044	0.044	0.045	0.043	0.044	0.045	0.046	0.043	0.046	0.044	0.041	0.044
	s	14	15	13	10	11	10	10	8	7	7	8	7	7	8	7
	nº dist. Geom.	28	30	26	20	22	20	20	16	14	14	16	14	14	16	14
	Mode	16	17	18	19	20	21	22	23	24	25	26	27	28	29	30
	min dis (Å)	0.045	0.043	0.044	0.043	0.044	0.041	0.043	0.042	0.041	0.042	0.039	0.04	0.039	0.039	0.042
	s	6	7	6	7	7	7	8	8	7	7	9	8	8	8	7
	nº dist. Geom.	12	14	12	14	14	14	16	16	14	14	18	16	16	16	14
	Mode	31	32	33	34	35	36	37	38	39	40	41	42	43	44	45
	min dis (Å)	0.039	0.041	0.041	0.039	0.034	0.04	0.037	0.038	0.038	0.036	0.034	0.033	0.041	0.042	0.036
	s	7	7	7	9	11	8	9	8	9	9	10	10	7	7	9
	nº dist. Geom.	14	14	14	18	22	16	18	16	18	18	20	20	14	14	18
